# Supplementary figures and images for: New Insights into the Mechanism of Ulva pertusa on Colitis in Mice: Modulation of the Pain and Immune System
Source: MDPI journal article supplement (doi:10.3390/md21050298), 2023-05-13

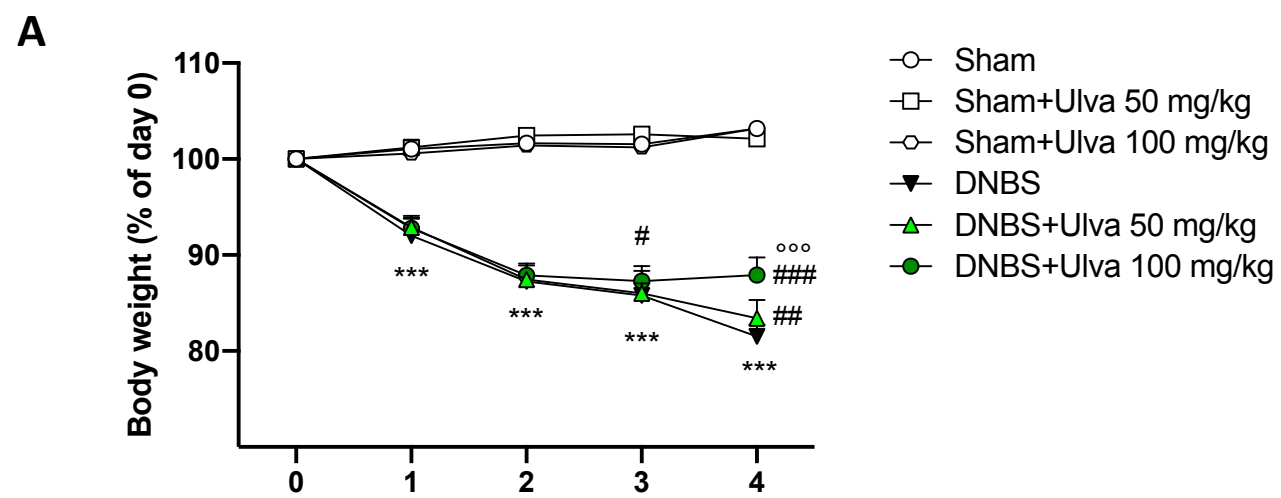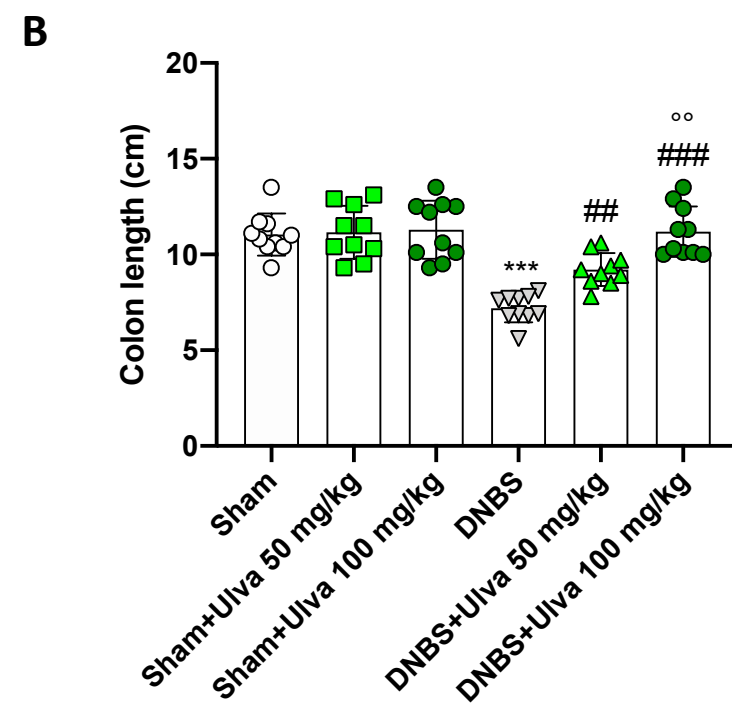

SHAM

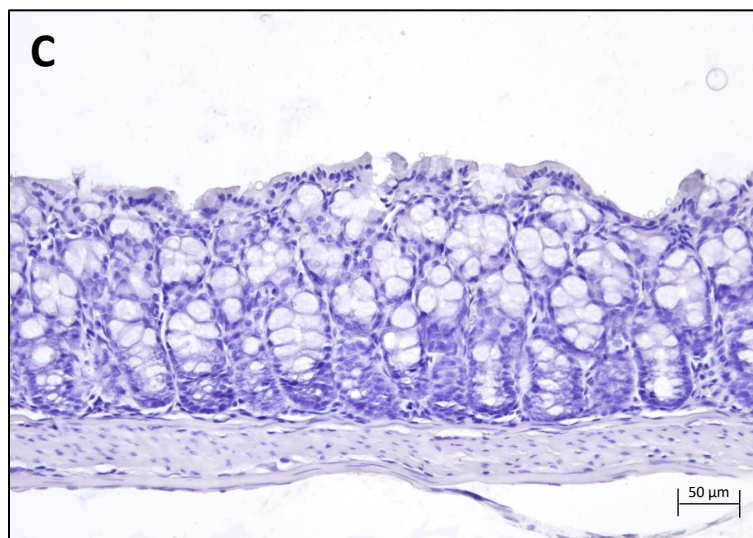

SHAM+Ulva 50 mg/kg

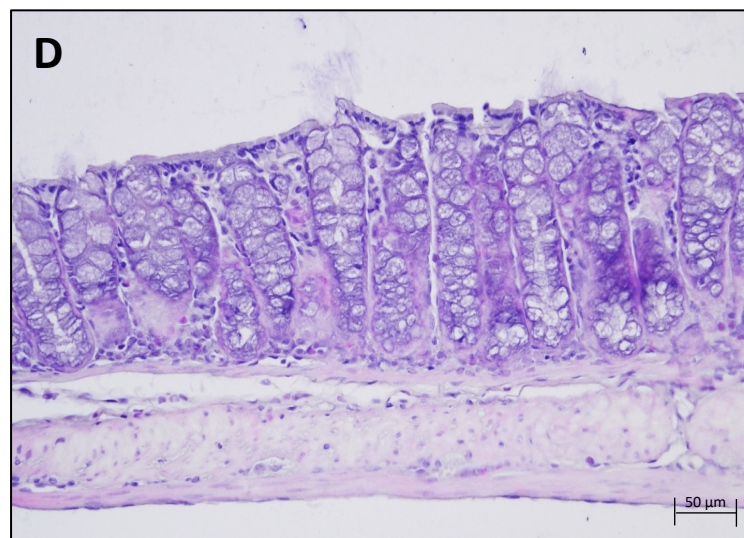

SHAM+Ulva 100 mg/kg

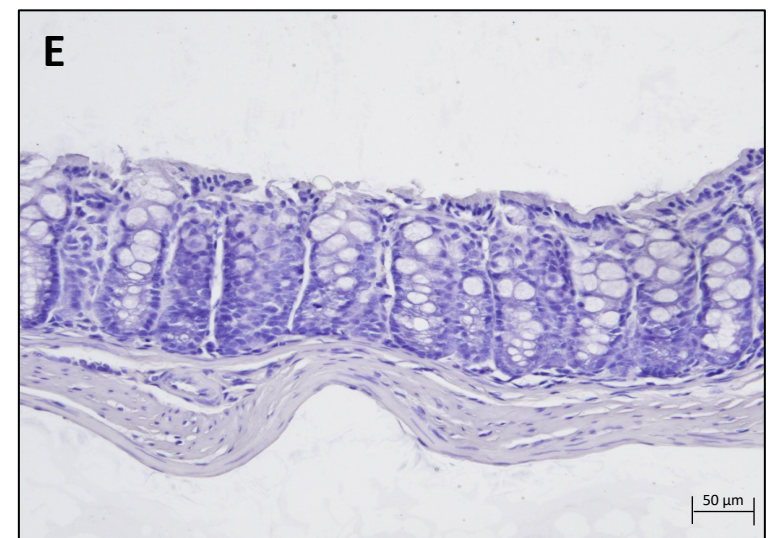

DNBS

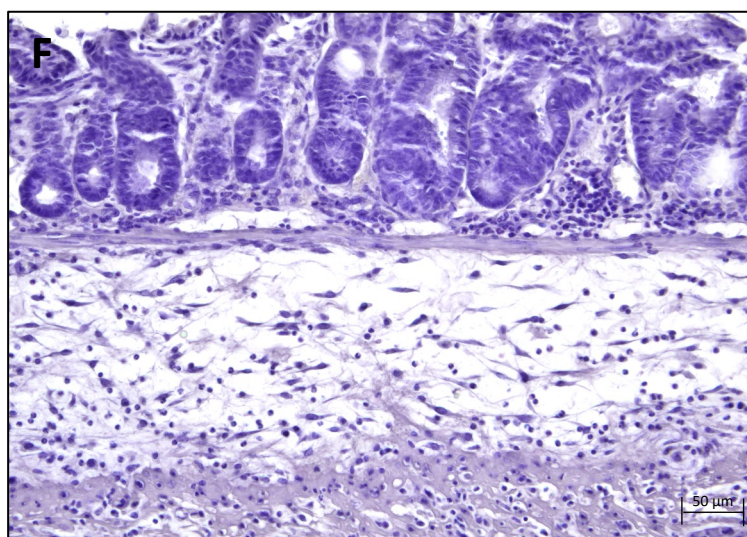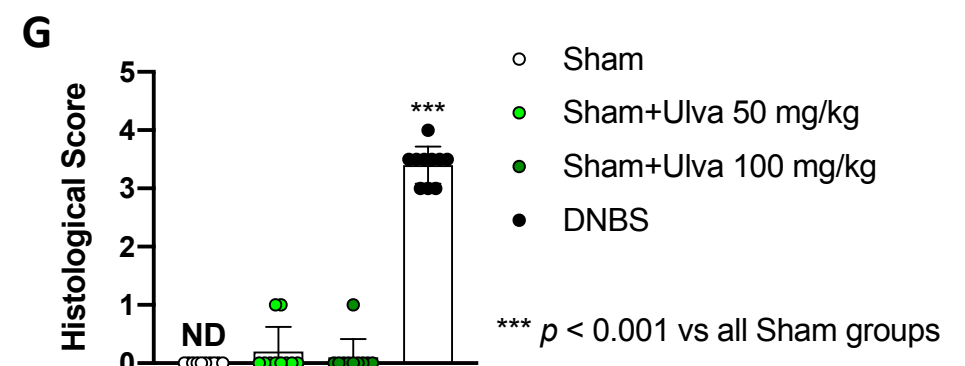

Supplement: s1 [file s1]
